# Supplementary material for: The Narrative Competence Task
Source: Atypon-hosted journal article supplement (doi:10.1027/1015-5759/a000569), 2020-03-13
Supplement: 1015-5759_a000569_esm3.pdf [file 1015-5759_a000569_esm3.pdf]

\* Encoding: UTF-8.

```
DATASET ACTIVATE Dataset1.  
SORT CASES BY Preschool_School.  
SPLIT FILE LAYERED BY Preschool_School.
```

```
DESCRIPTIVES VARIABLES=Age_in_months  
/STATISTICS=MEAN STDDEV MIN MAX.
```

```
SORT CASES BY Age_group.  
SPLIT FILE LAYERED BY Age_group.
```

```
DESCRIPTIVES VARIABLES=Age_in_months Nonverbal_reasoning  
/STATISTICS=MEAN STDDEV MIN MAX.
```

```
SPLIT FILE OFF.
```

```
UNIANOVA CPM_raw_score BY Age_group  
/METHOD=SSTYPE(3)  
/INTERCEPT=INCLUDE  
/POSTHOC=Age_group(BONFERRONI)  
/PRINT ETASQ  
/CRITERIA=ALPHA(.05)  
/DESIGN=Age_group.
```

```
UNIANOVA SRT_score BY Age_group  
/METHOD=SSTYPE(3)  
/INTERCEPT=INCLUDE  
/POSTHOC=Age_group(BONFERRONI)  
/PRINT ETASQ  
/CRITERIA=ALPHA(.05)  
/DESIGN=Age_group.
```

```
UNIANOVA TROG_2 BY Age_group  
/METHOD=SSTYPE(3)  
/INTERCEPT=INCLUDE  
/POSTHOC=Age_group(BONFERRONI)  
/PRINT ETASQ  
/CRITERIA=ALPHA(.05)  
/DESIGN=Age_group.
```

```
UNIANOVA Quantity_of_information BY Age_group  
/METHOD=SSTYPE(3)  
/INTERCEPT=INCLUDE  
/POSTHOC=Age_group(BONFERRONI)  
/PRINT ETASQ  
/CRITERIA=ALPHA(.05)
```

/DESIGN=Age\_group.

UNIANOVA Structure BY Age\_group

/METHOD=SSTYPE(3)  
/INTERCEPT=INCLUDE  
/POSTHOC=Age\_group(BONFERRONI)  
/PRINT ETASQ  
/CRITERIA=ALPHA(.05)  
/DESIGN=Age\_group.

UNIANOVA Mental\_state\_lexicon BY Age\_group

/METHOD=SSTYPE(3)  
/INTERCEPT=INCLUDE  
/POSTHOC=Age\_group(BONFERRONI)  
/PRINT ETASQ  
/CRITERIA=ALPHA(.05)  
/DESIGN=Age\_group.

UNIANOVA D\_index BY Age\_group

/METHOD=SSTYPE(3)  
/INTERCEPT=INCLUDE  
/POSTHOC=Age\_group(BONFERRONI)  
/PRINT ETASQ  
/CRITERIA=ALPHA(.05)  
/DESIGN=Age\_group.

UNIANOVA MLU BY Age\_group

/METHOD=SSTYPE(3)  
/INTERCEPT=INCLUDE  
/POSTHOC=Age\_group(BONFERRONI)  
/PRINT ETASQ  
/CRITERIA=ALPHA(.05)  
/DESIGN=Age\_group.

UNIANOVA CPM\_raw\_score BY Preschool\_School

/METHOD=SSTYPE(3)  
/INTERCEPT=INCLUDE  
/PRINT ETASQ  
/CRITERIA=ALPHA(.05)  
/DESIGN=Preschool\_School.

UNIANOVA SRT\_score BY Preschool\_School

/METHOD=SSTYPE(3)  
/INTERCEPT=INCLUDE  
/PRINT ETASQ  
/CRITERIA=ALPHA(.05)  
/DESIGN=Preschool\_School.

UNIANOVA TROG\_2 BY Preschool\_School

```
/METHOD=SSTYPE(3)  
/INTERCEPT=INCLUDE  
/PRINT ETASQ  
/CRITERIA=ALPHA(.05)  
/DESIGN=Preschool_School.
```

UNIANOVA Quantity\_of\_information BY Preschool\_School

```
/METHOD=SSTYPE(3)  
/INTERCEPT=INCLUDE  
/PRINT ETASQ  
/CRITERIA=ALPHA(.05)  
/DESIGN=Preschool_School.
```

UNIANOVA Structure BY Preschool\_School

```
/METHOD=SSTYPE(3)  
/INTERCEPT=INCLUDE  
/PRINT ETASQ  
/CRITERIA=ALPHA(.05)  
/DESIGN=Preschool_School.
```

UNIANOVA Mental\_state\_lexicon BY Preschool\_School

```
/METHOD=SSTYPE(3)  
/INTERCEPT=INCLUDE  
/PRINT ETASQ  
/CRITERIA=ALPHA(.05)  
/DESIGN=Preschool_School.
```

UNIANOVA D\_index BY Preschool\_School

```
/METHOD=SSTYPE(3)  
/INTERCEPT=INCLUDE  
/PRINT ETASQ  
/CRITERIA=ALPHA(.05)  
/DESIGN=Preschool_School.
```

UNIANOVA MLU BY Preschool\_School

```
/METHOD=SSTYPE(3)  
/INTERCEPT=INCLUDE  
/PRINT ETASQ  
/CRITERIA=ALPHA(.05)  
/DESIGN=Preschool_School.
```

CORRELATIONS

```
/VARIABLES=D_index Bus_Story_D_index  
/PRINT=TWOTAIL NOSIG  
/MISSING=PAIRWISE.
```

CORRELATIONS

```
/VARIABLES=MLU Bus_Story_MLU  
/PRINT=TWOTAIL NOSIG  
/MISSING=PAIRWISE.
```

CORRELATIONS

```
/VARIABLES=Quantity_of_information Bus_Story_Events  
/PRINT=TWOTAIL NOSIG  
/MISSING=PAIRWISE.
```

REGRESSION

```
/MISSING LISTWISE  
/STATISTICS COEFF OUTS R ANOVA CHANGE  
/CRITERIA=PIN(.05) POUT(.10)  
/NOORIGIN  
/DEPENDENT Quantity_of_information  
/METHOD=ENTER CPM_raw_score SRT_score  
/METHOD=ENTER TROG_2 D_index MLU  
/METHOD=ENTER Age_in_months.
```

REGRESSION

```
/MISSING LISTWISE  
/STATISTICS COEFF OUTS R ANOVA CHANGE  
/CRITERIA=PIN(.05) POUT(.10)  
/NOORIGIN  
/DEPENDENT Structure  
/METHOD=ENTER CPM_raw_score SRT_score  
/METHOD=ENTER TROG_2 D_index MLU  
/METHOD=ENTER Age_in_months.
```

REGRESSION

```
/MISSING LISTWISE  
/STATISTICS COEFF OUTS R ANOVA CHANGE  
/CRITERIA=PIN(.05) POUT(.10)  
/NOORIGIN  
/DEPENDENT Mental_state_lexicon  
/METHOD=ENTER CPM_raw_score SRT_score  
/METHOD=ENTER TROG_2 D_index MLU  
/METHOD=ENTER Age_in_months.
```
