# Supplementary figures and images for: The Narrative Competence Task
Source: Atypon-hosted journal article supplement (doi:10.1027/1015-5759/a000569), 2020-03-13

Some pictures from the Narrative Competence Task (Picture 3, 6, and 16)

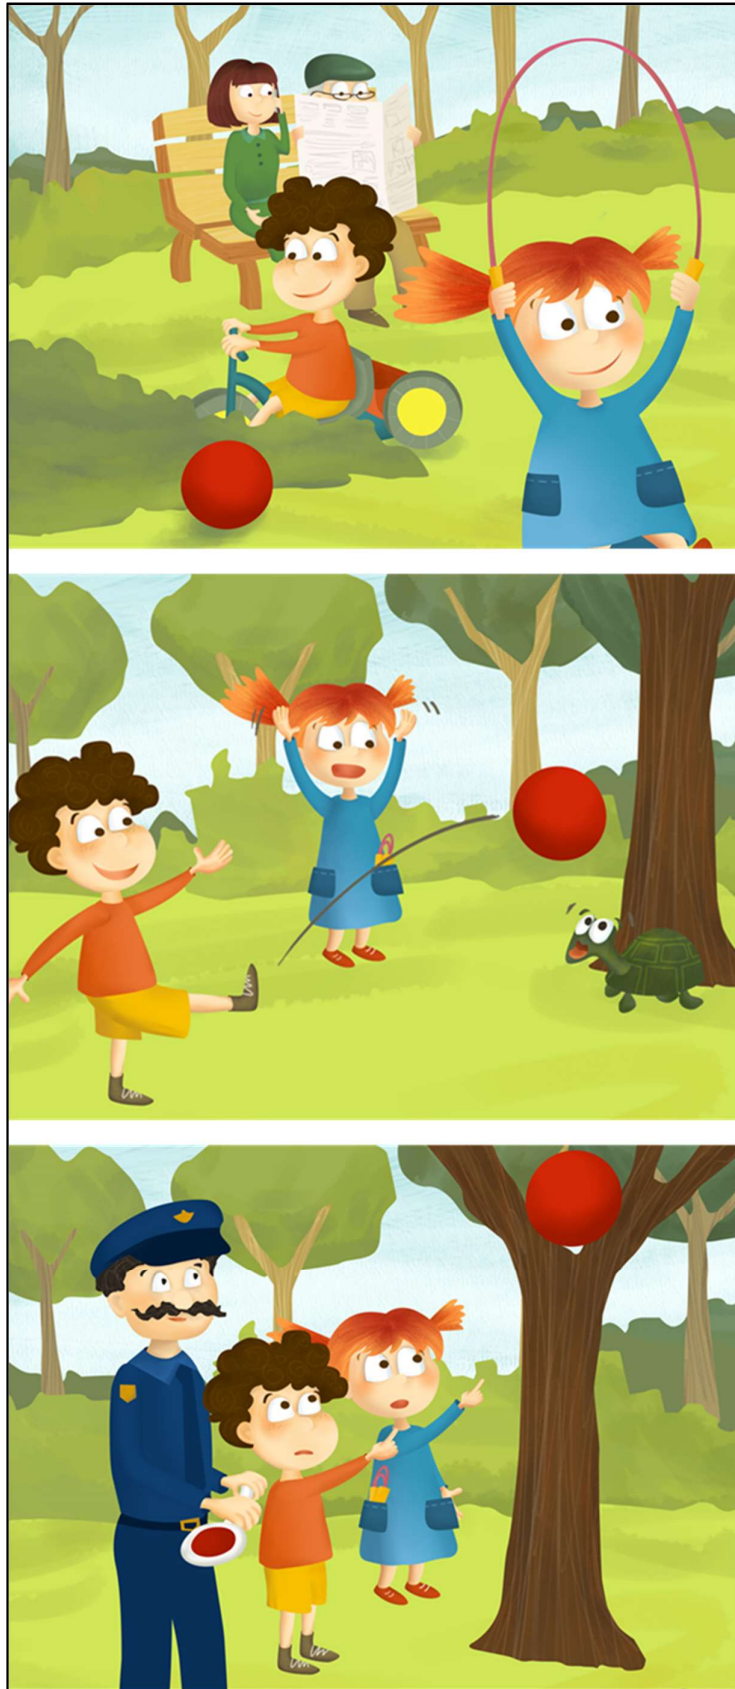

Supplement: 1015-5759_a000569_esm1.pdf [file 1015-5759_a000569_esm1.pdf]
